# Supplementary material
Source: PubMed Central journal article supplement (PMC1459233)
Supplement: pbio.0040137.sg001.pdf [file pbio.0040137.sg001.pdf]

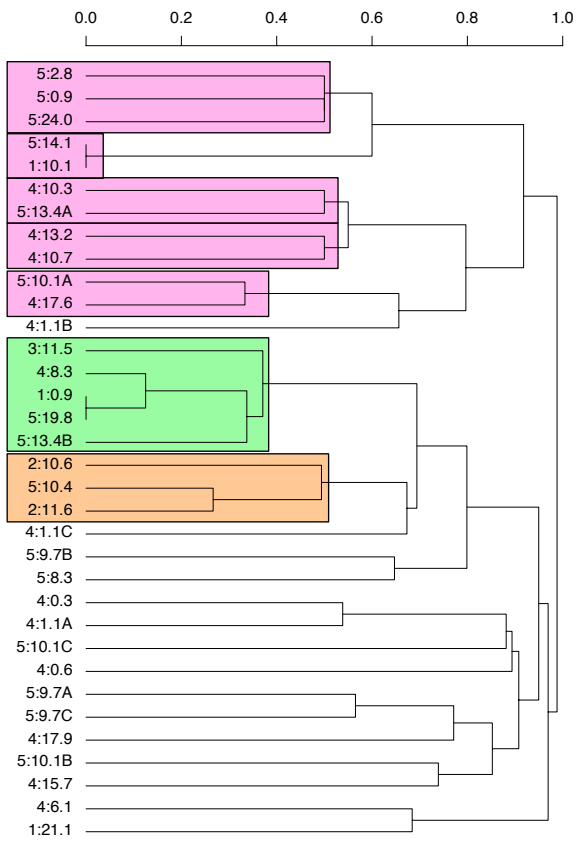

Mostly Northern Sweden

Exclusively US

Majority from US, England, or Southern Sweden

EHH

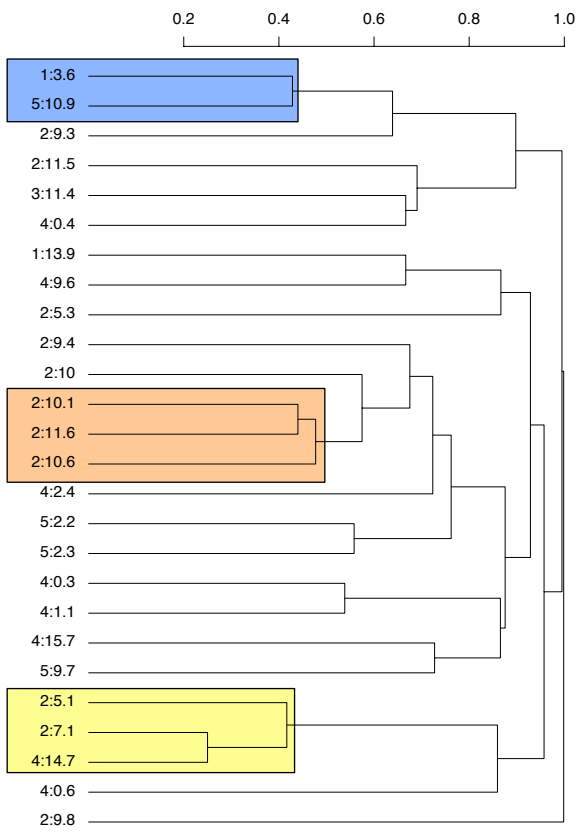

Northern Sweden and Finland

Mostly England

PHS
