# Supplementary material
Source: PubMed Central journal article supplement (PMC1459233)

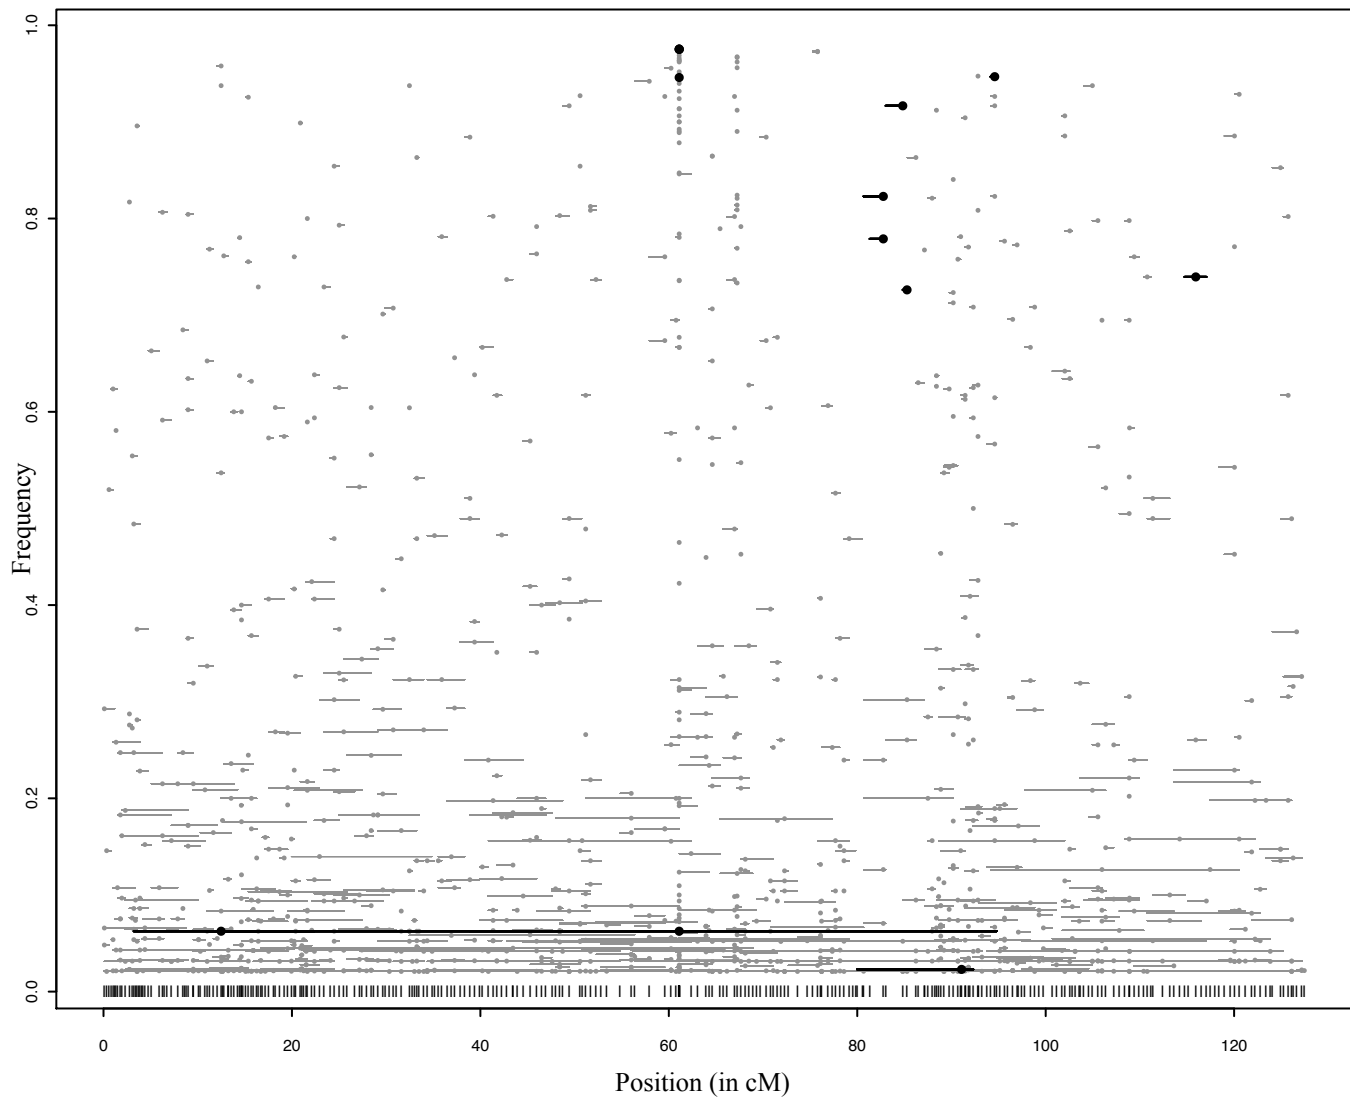

Supplement: pbio.0040137.sg002.pdf [file pbio.0040137.sg002.pdf]

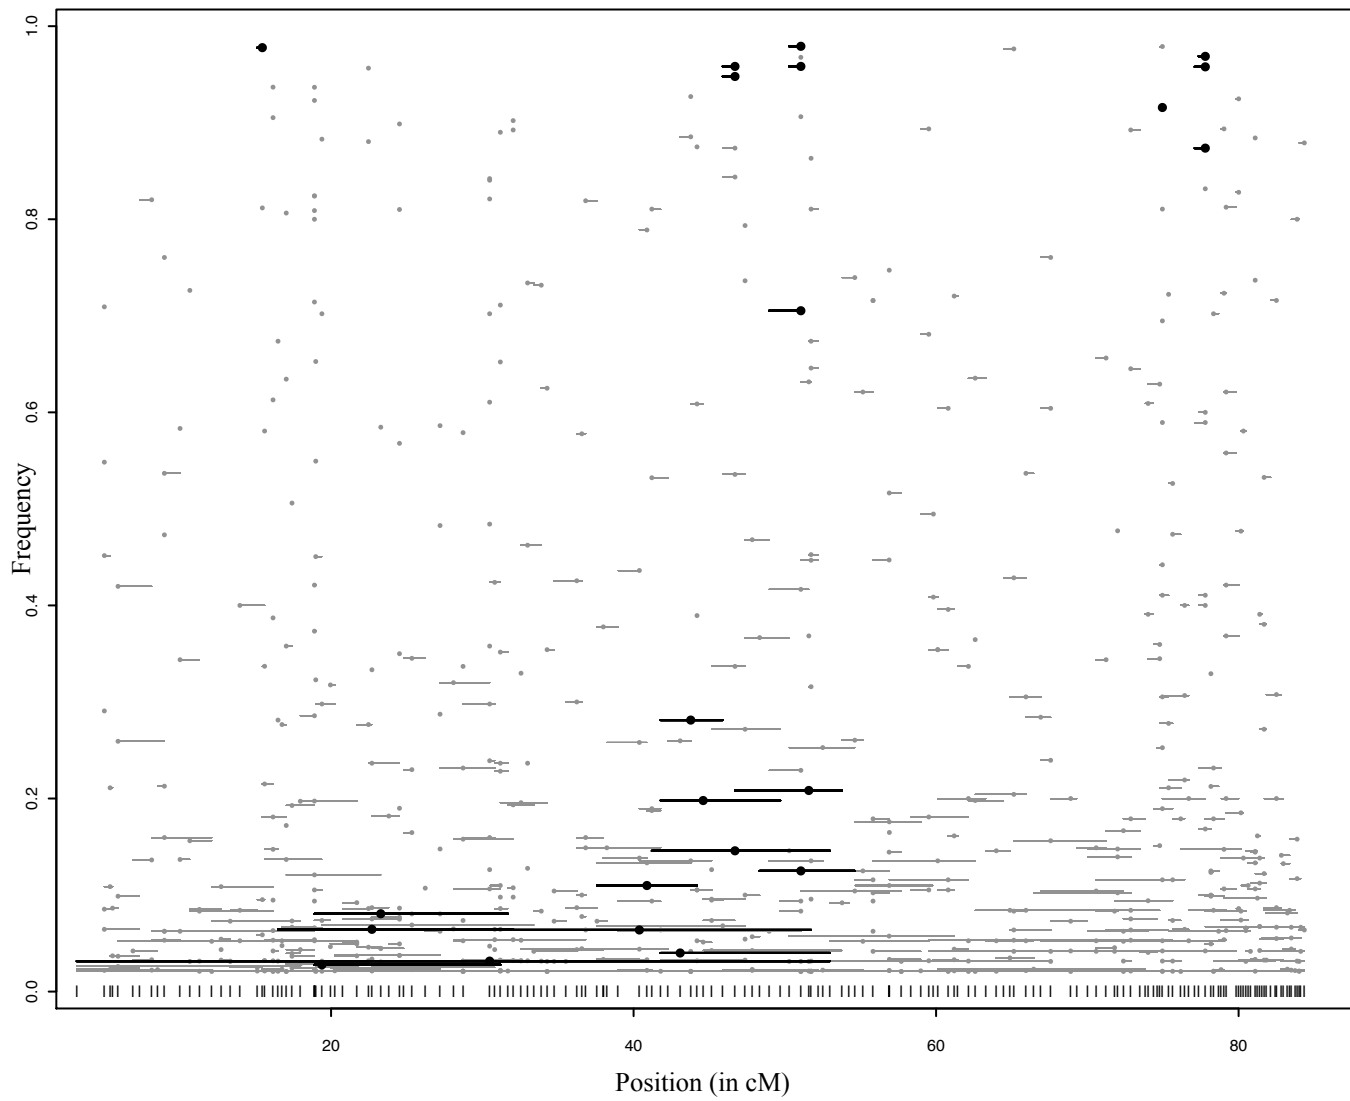

Supplement: pbio.0040137.sg003.pdf [file pbio.0040137.sg003.pdf]

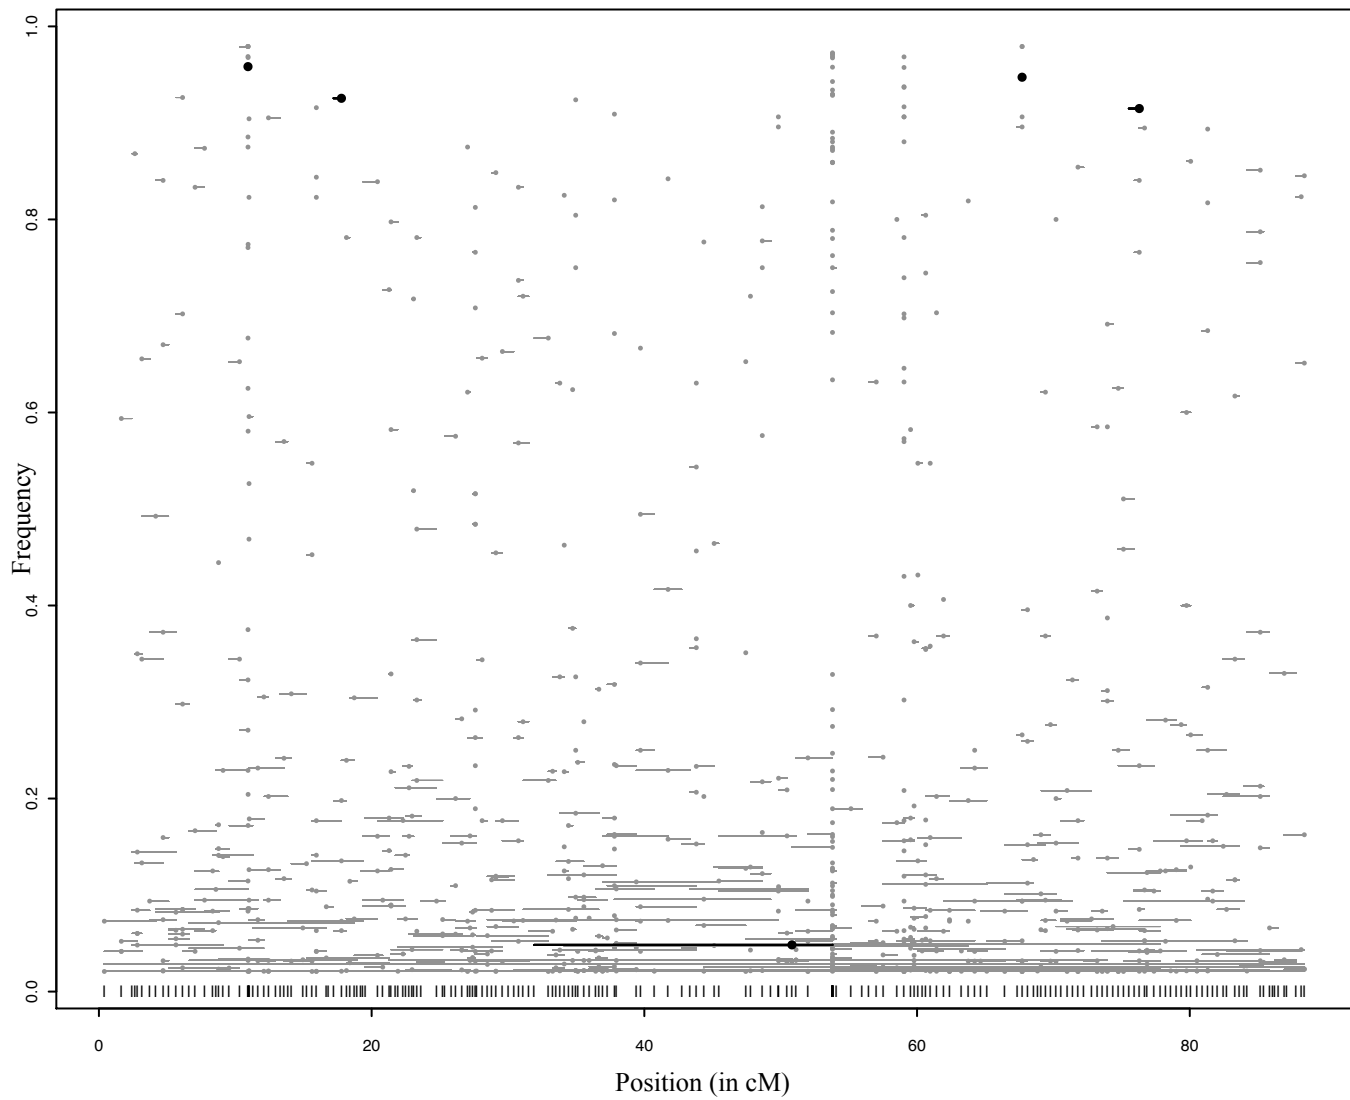

Supplement: pbio.0040137.sg004.pdf [file pbio.0040137.sg004.pdf]

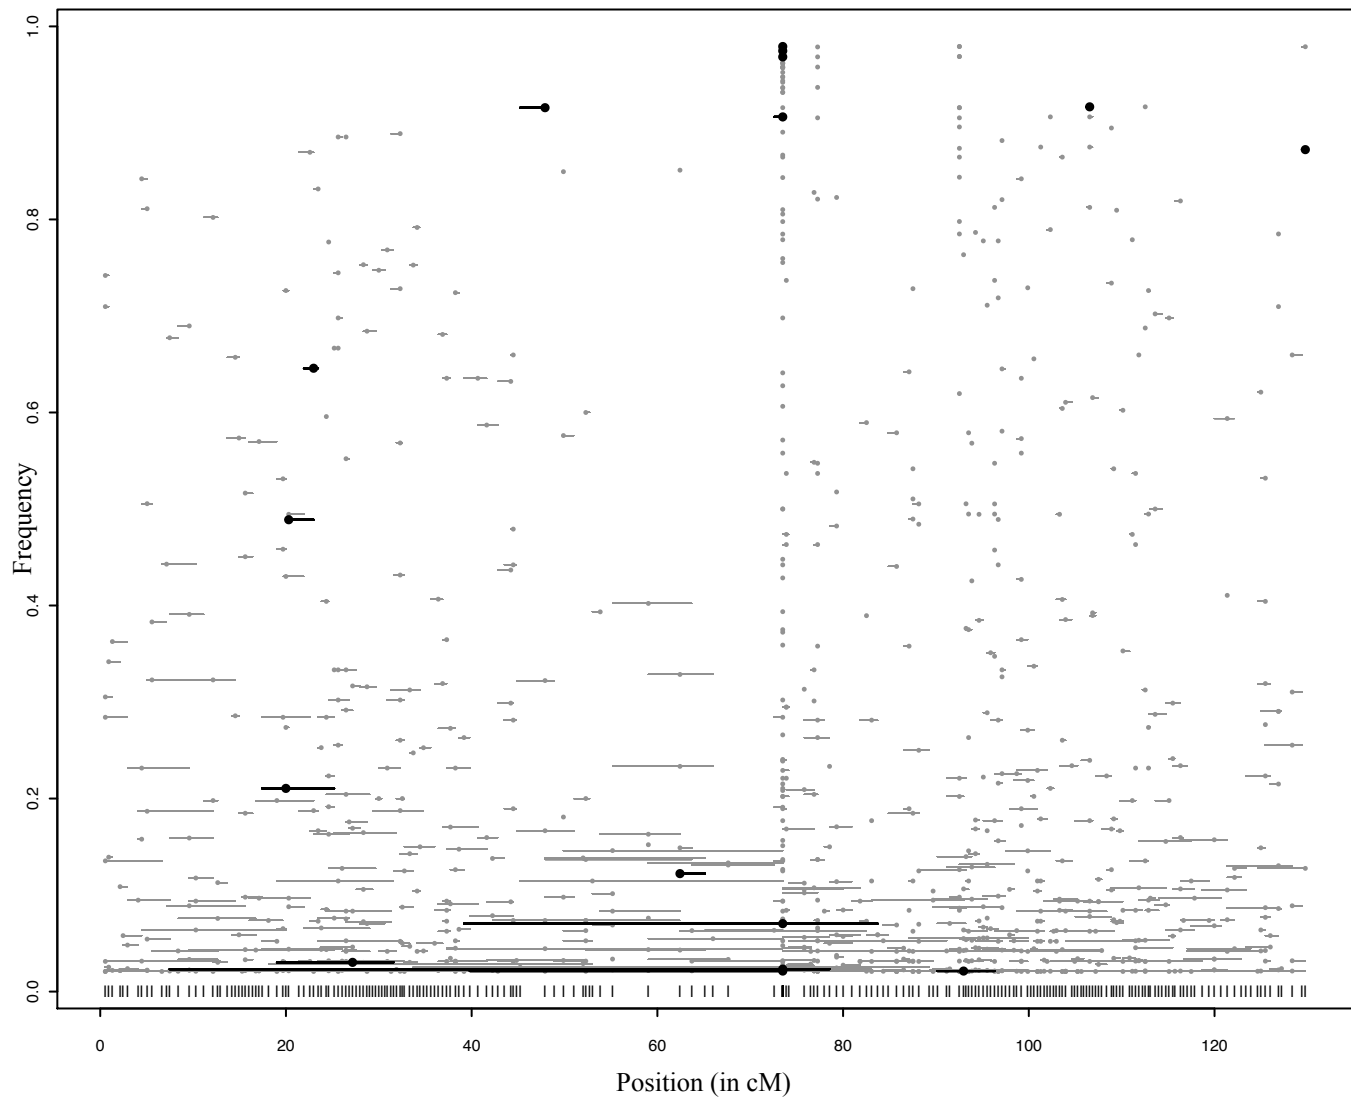

Supplement: pbio.0040137.sg005.pdf [file pbio.0040137.sg005.pdf]

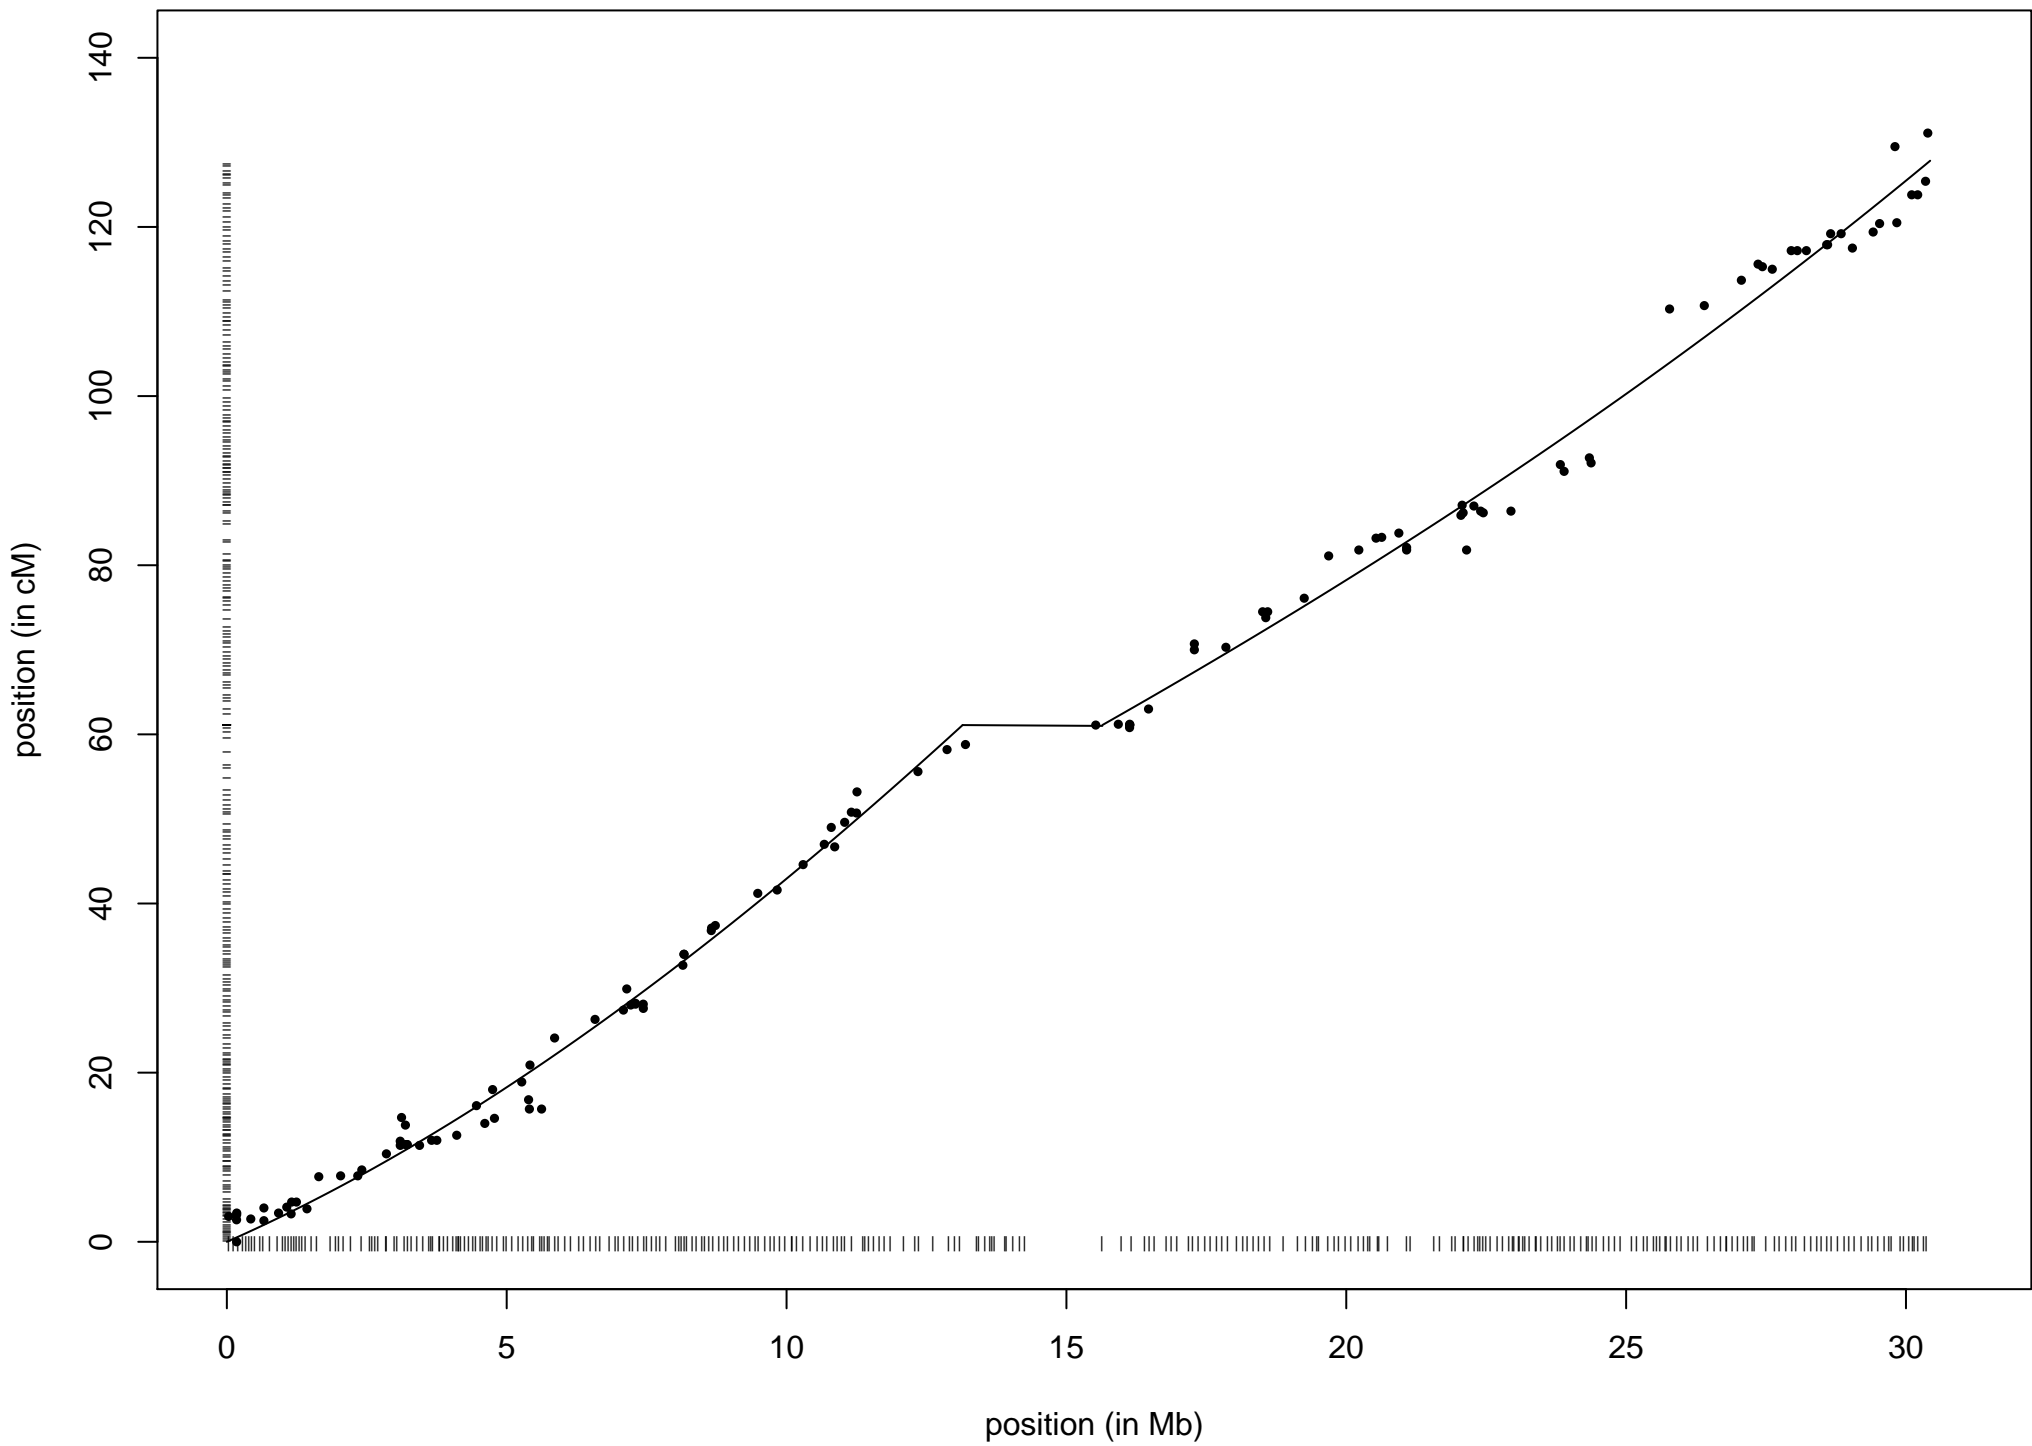

Supplement: pbio.0040137.sg007.pdf [file pbio.0040137.sg007.pdf]

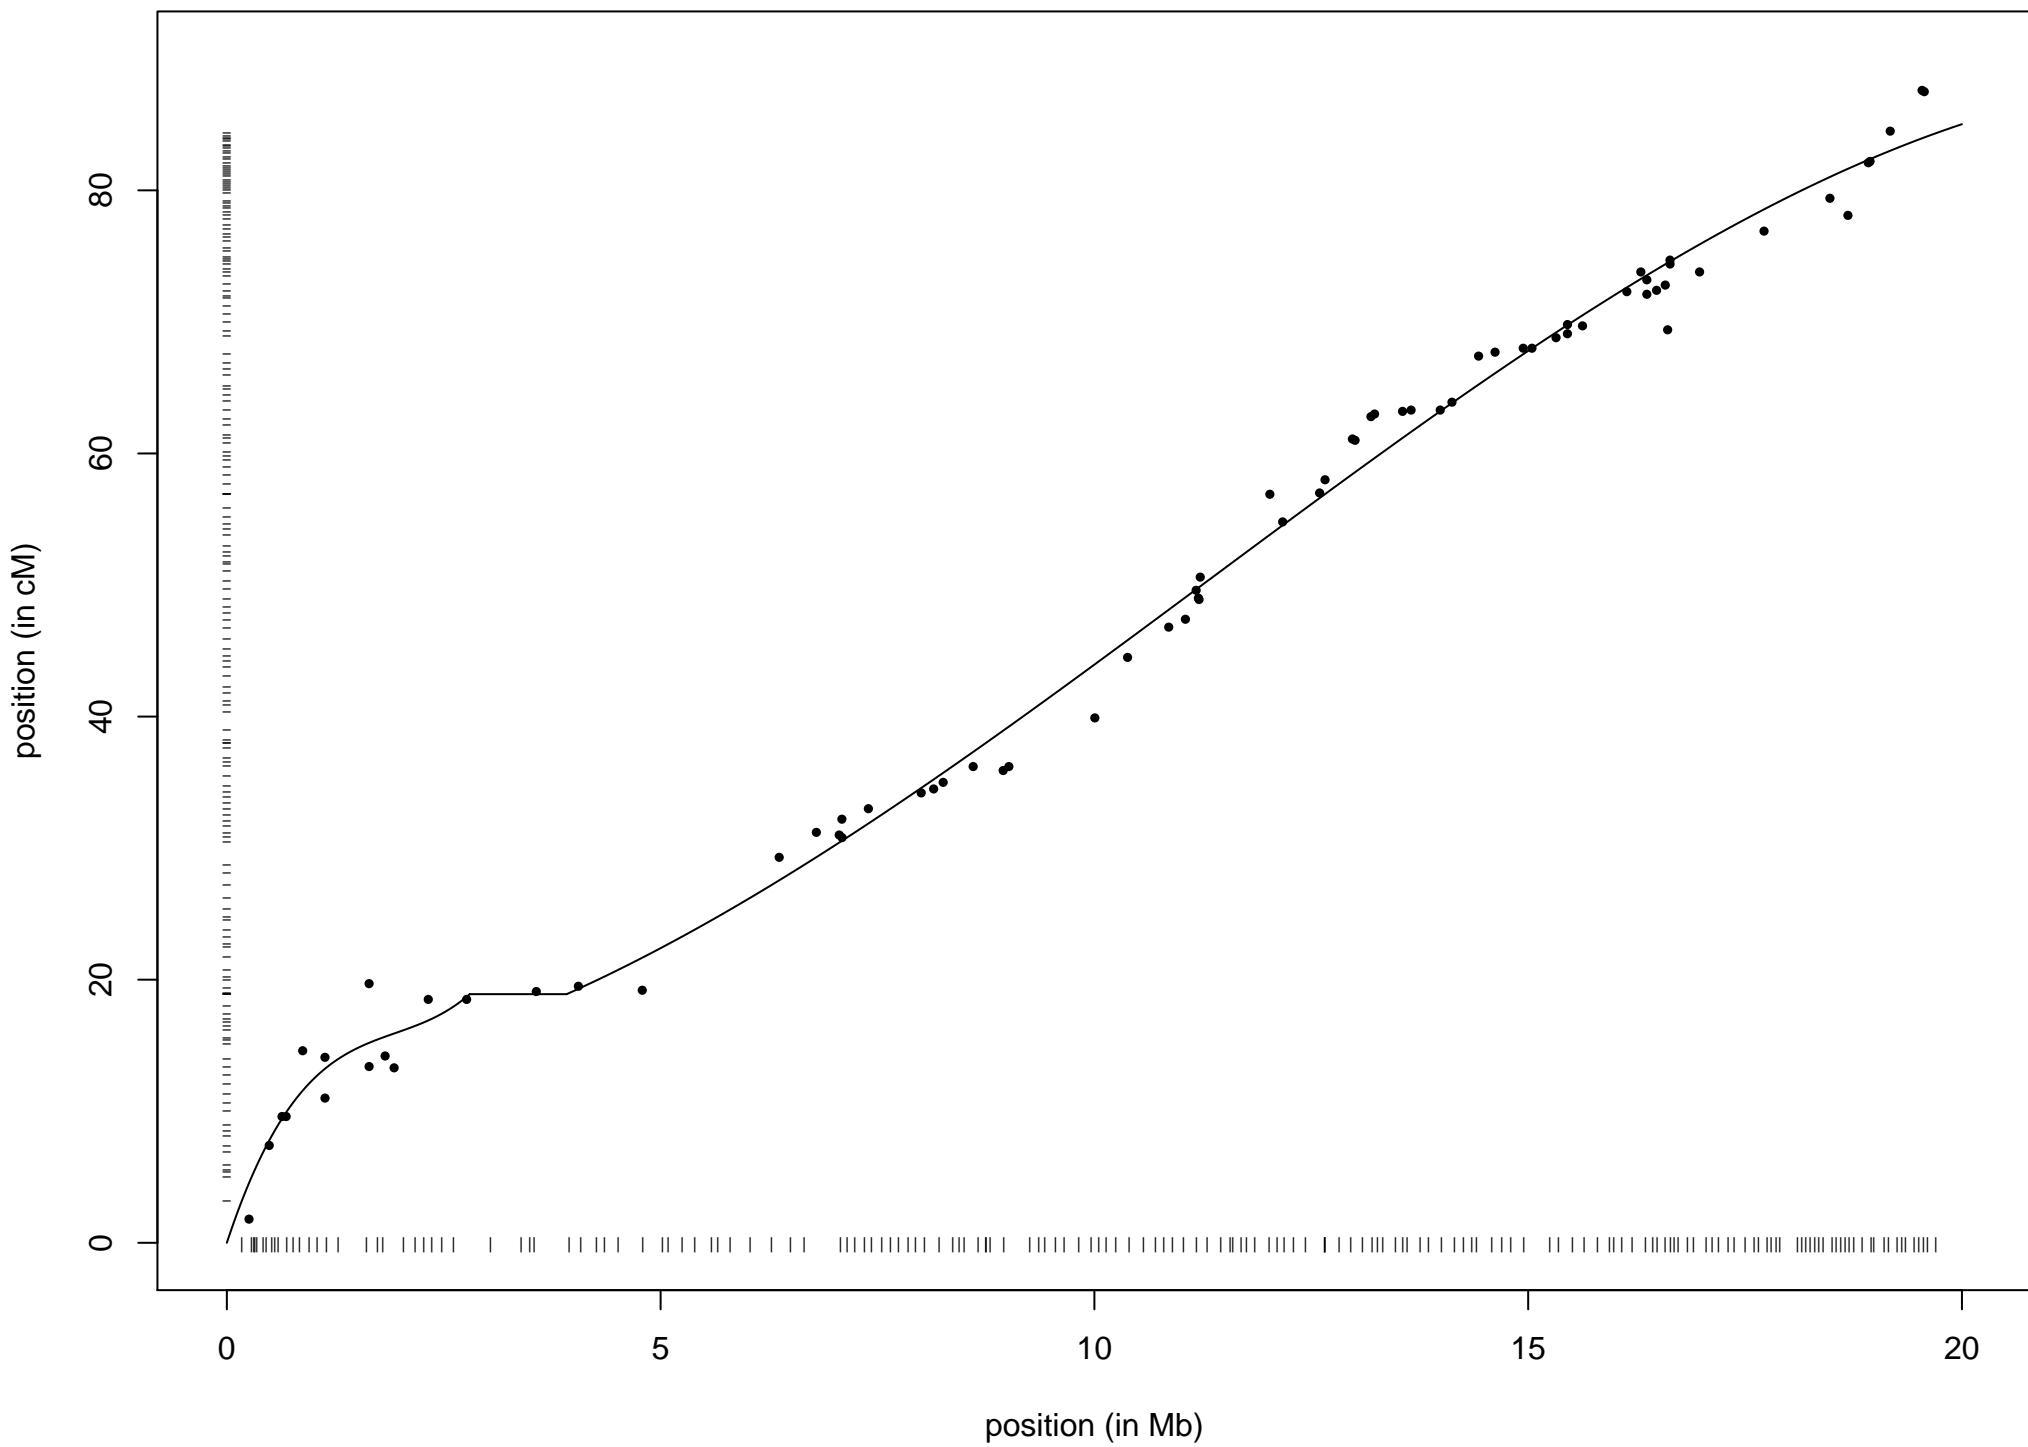

Supplement: pbio.0040137.sg008.pdf [file pbio.0040137.sg008.pdf]

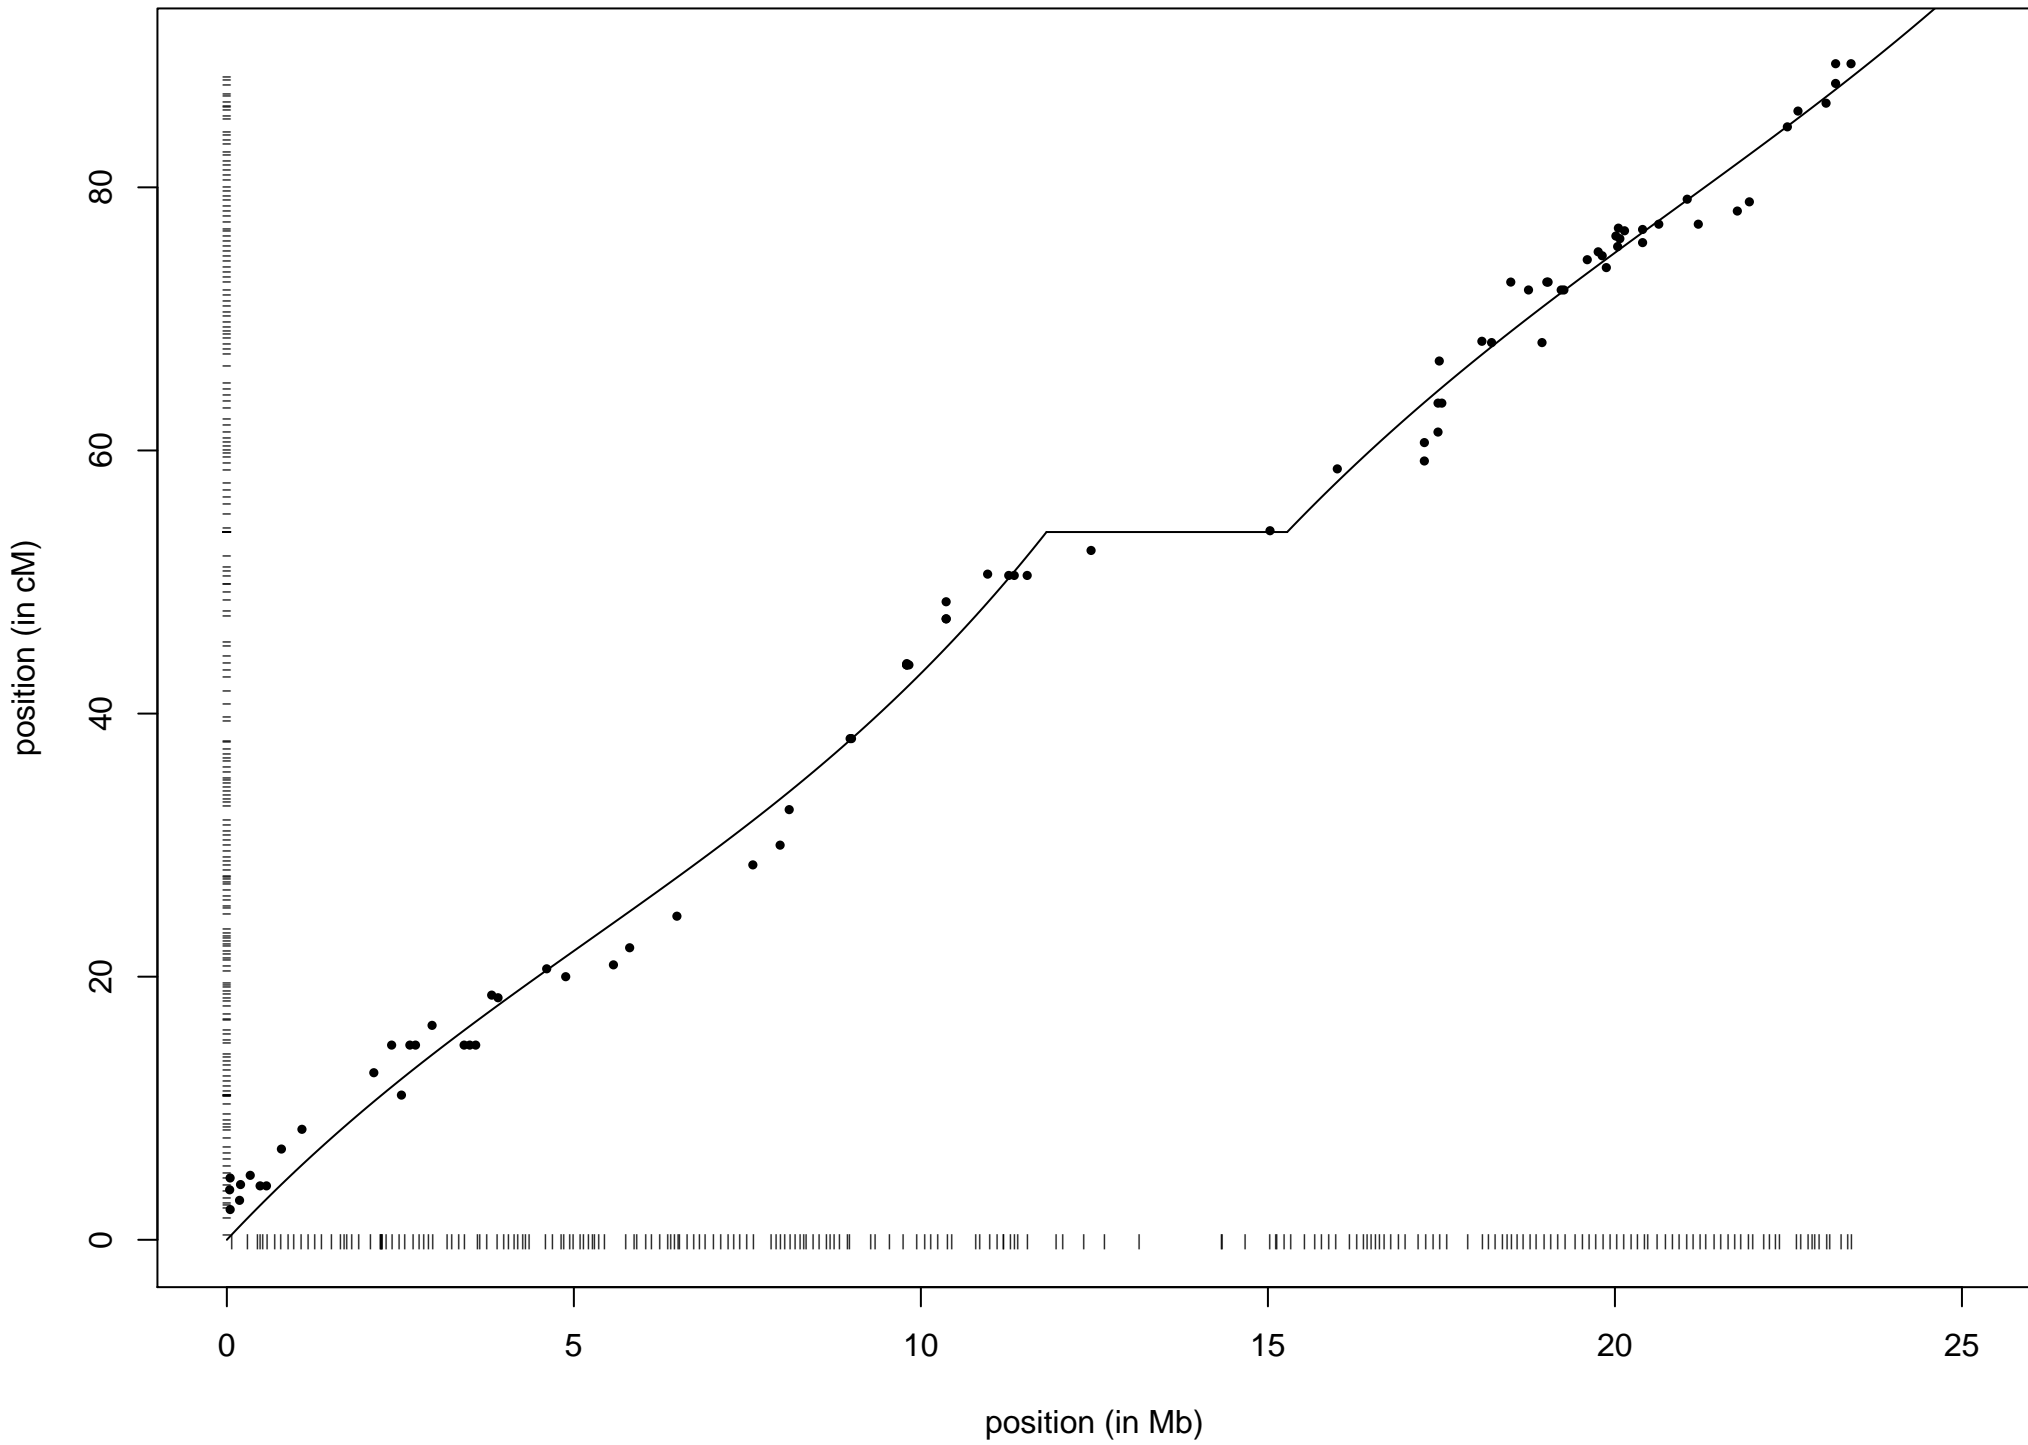

Supplement: pbio.0040137.sg009.pdf [file pbio.0040137.sg009.pdf]

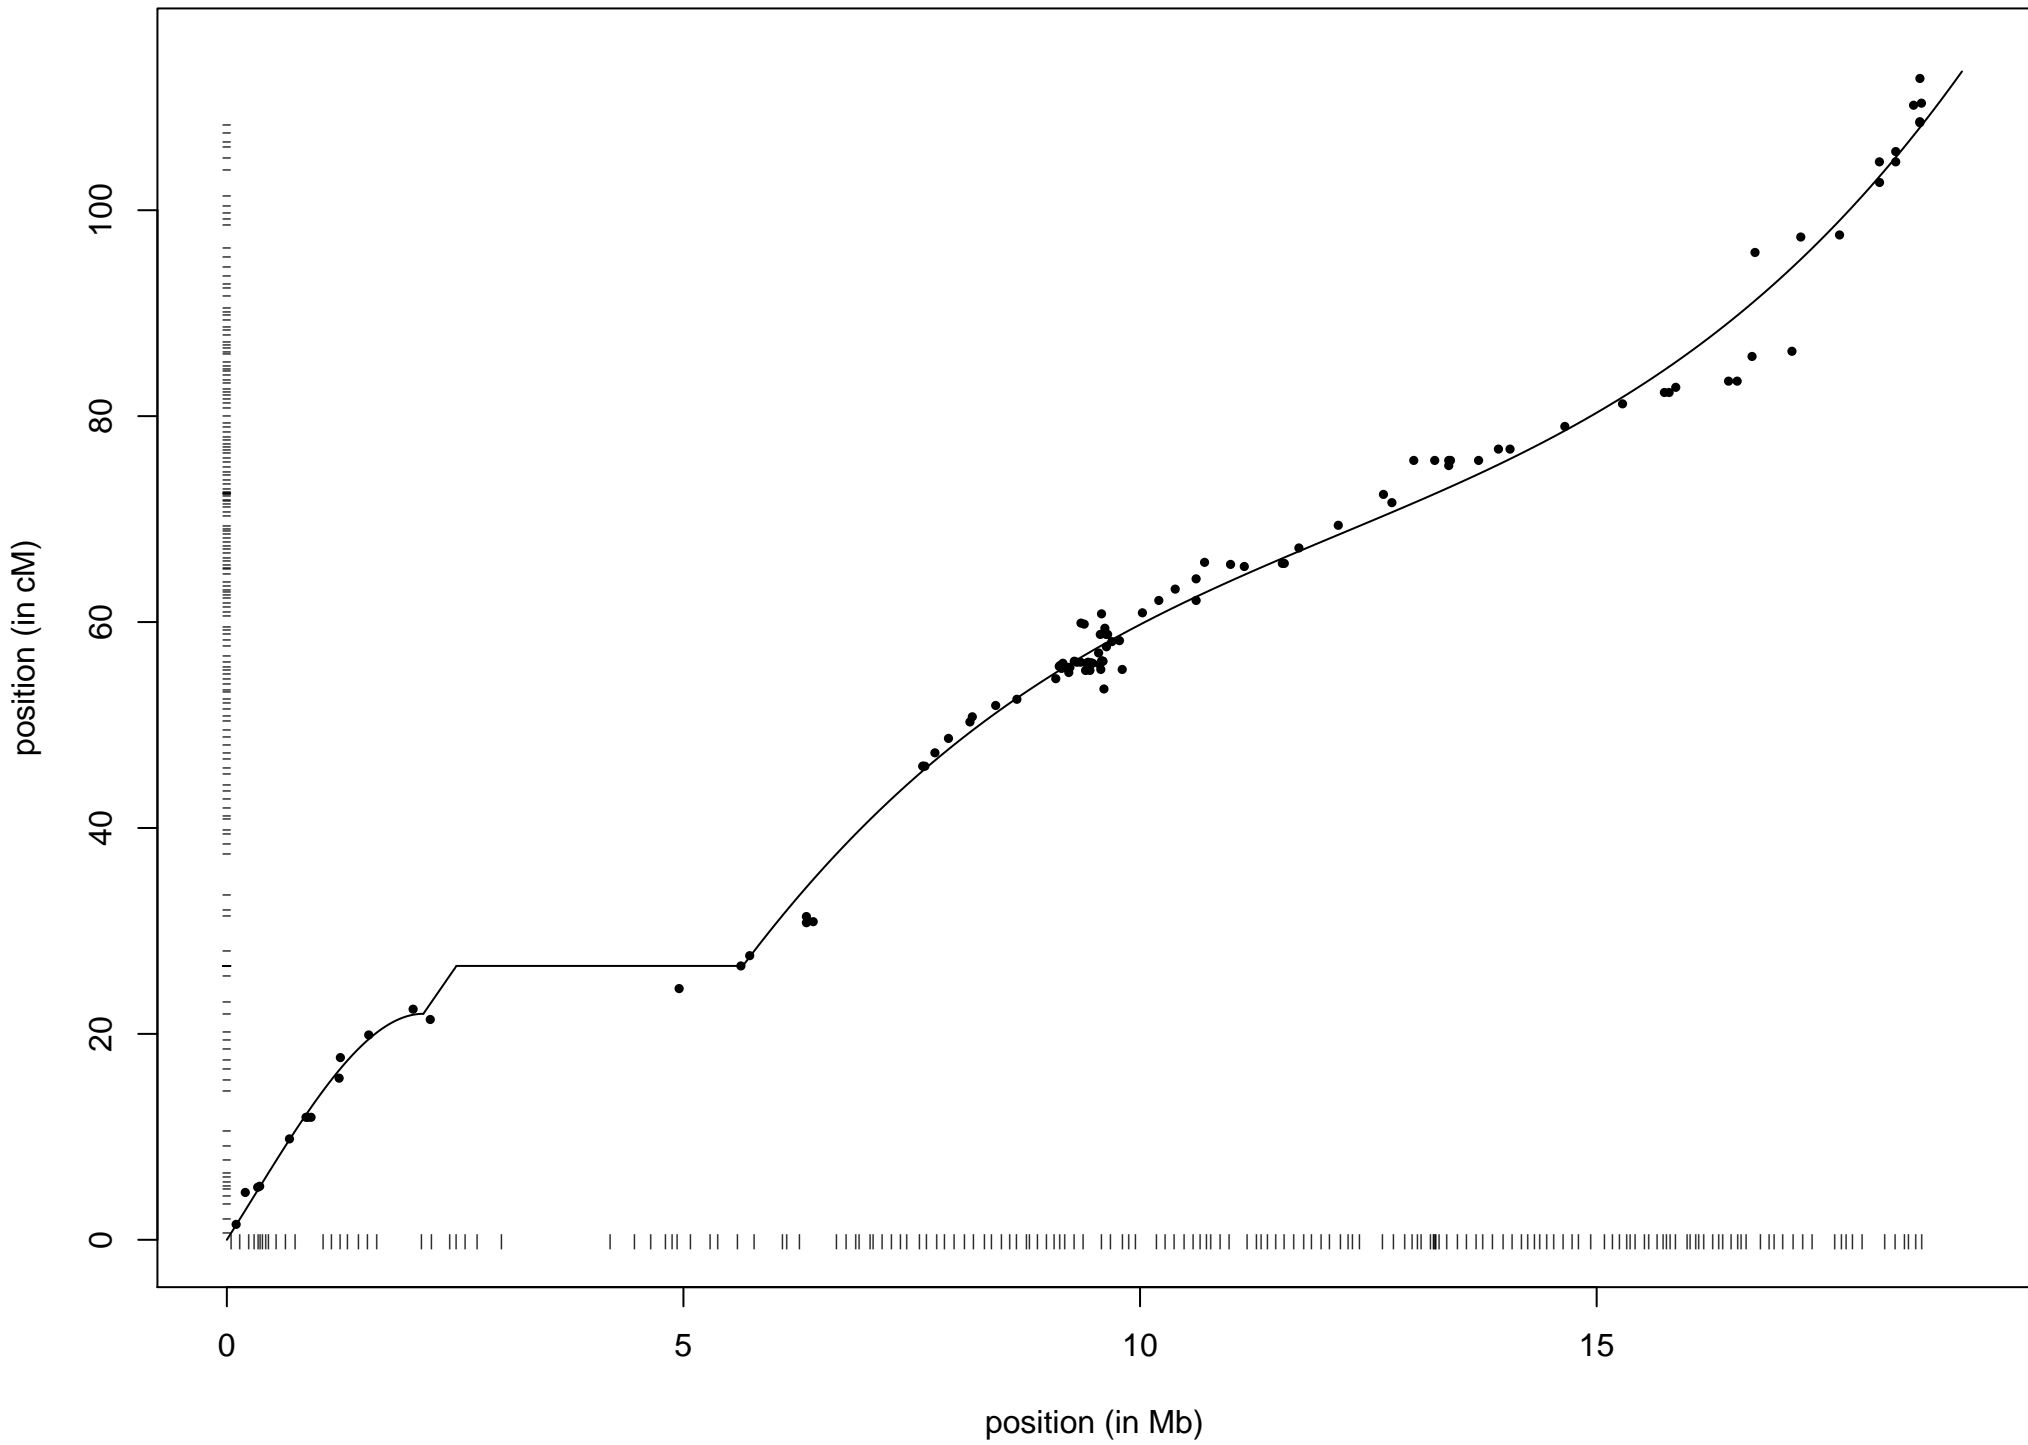

Supplement: pbio.0040137.sg010.pdf [file pbio.0040137.sg010.pdf]

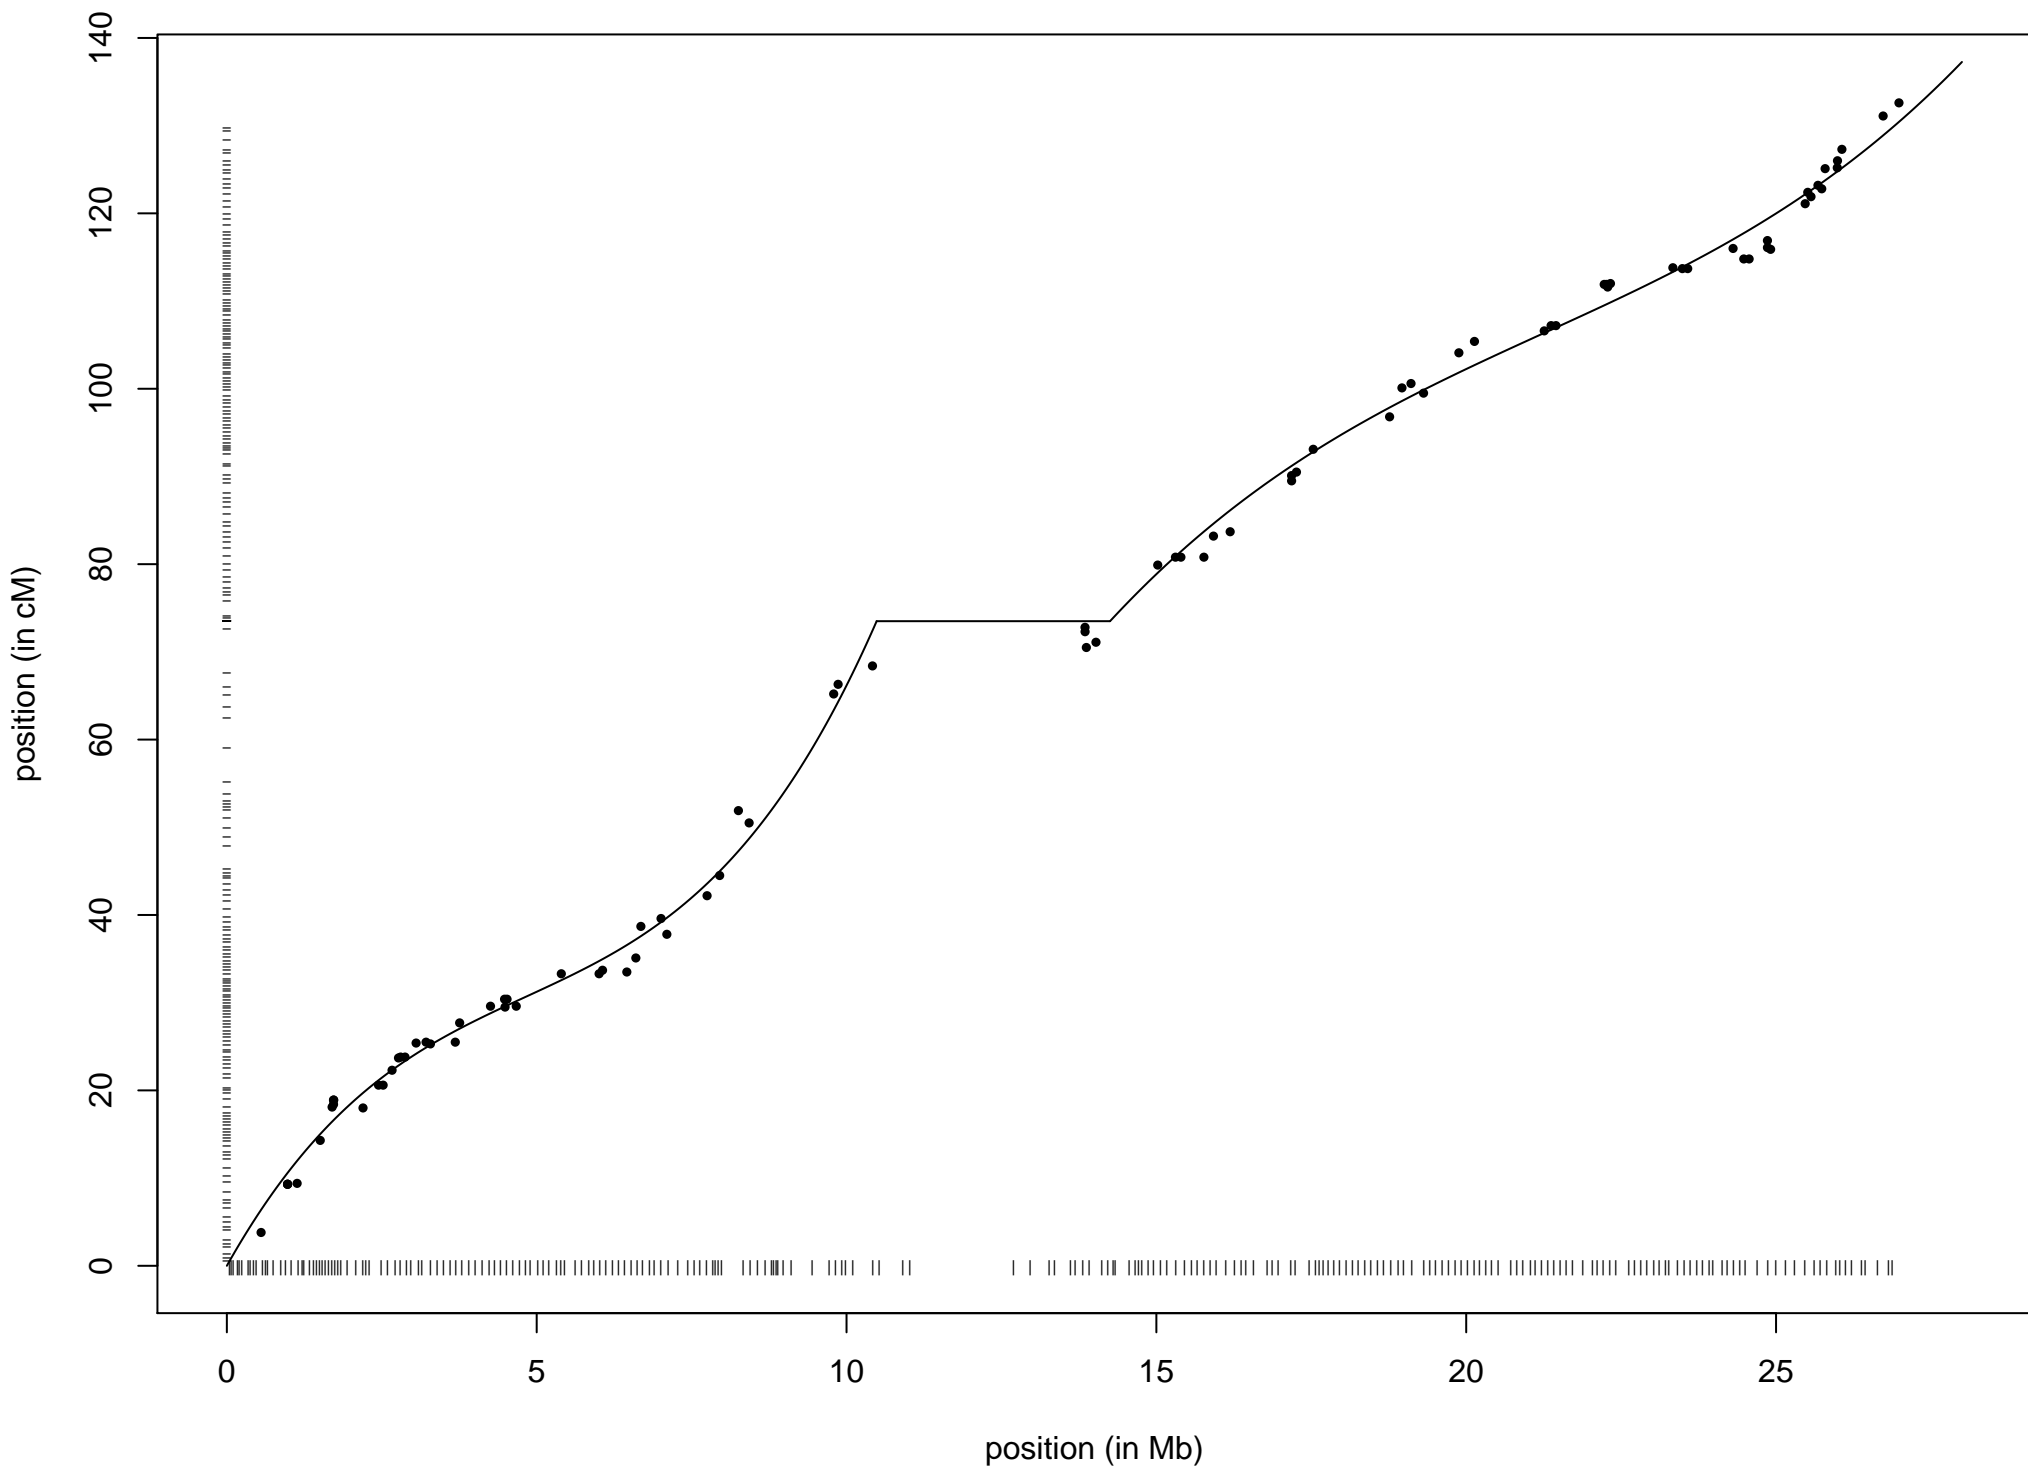

Supplement: pbio.0040137.sg011.pdf [file pbio.0040137.sg011.pdf]
